# Supplementary material for: Longitudinal Serology of SARS-CoV-2-Infected Individuals in India: A Prospective Cohort Study
Source: PubMed Central journal article supplement (PMC8274753; doi:10.4269/ajtmh.21-0164), 2021-05-18
Supplement: tpmd210164.SD1.pdf [file tpmd210164.SD1.pdf]

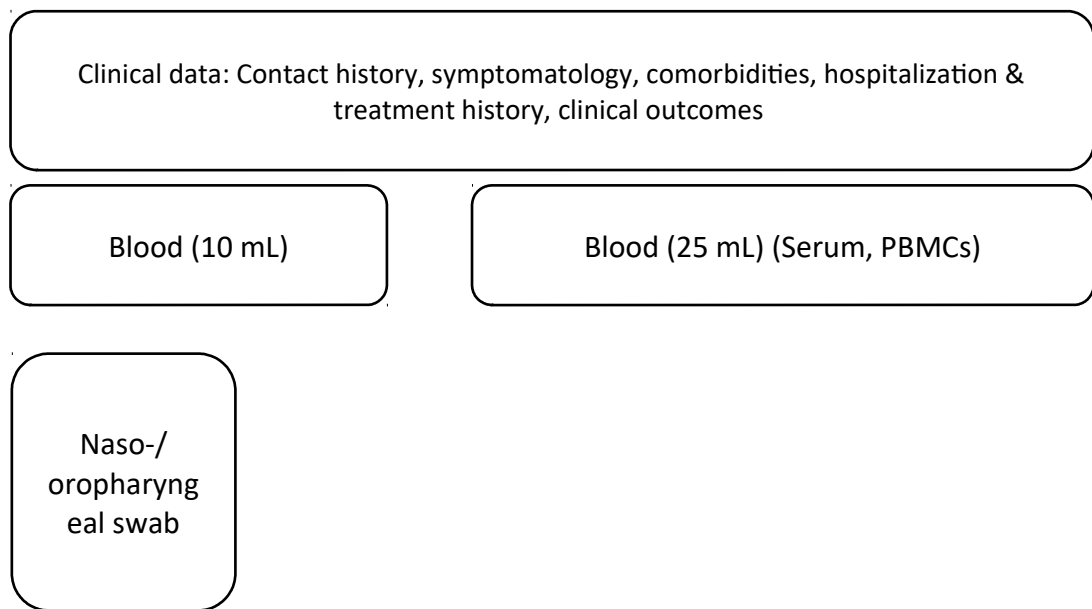

**Supplemental Figure 1.** Study flow of the cohort. The follow up presented here is up to 6-10 weeks.

**Supplemental Figure 2.** Comparison of RT-PCR threshold values (CT) between asymptomatic and symptomatic participants among seroconverters and non-seroconverters (N=169).

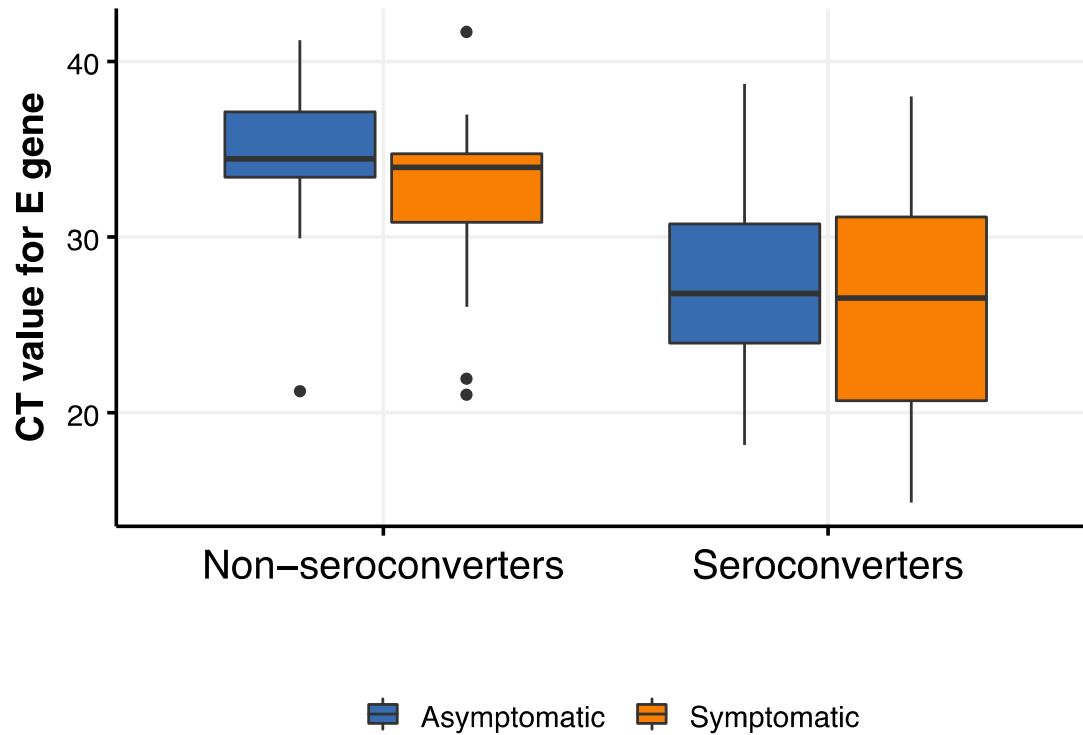

False: Non seroconverters; True: Seroconverters. Statistical test applied between asymptomatic and symptomatic groups: Mann Whitney test; among seroconverters: p-value 0.48 and among non seroconverters: *P*-value 0.16.

**Supplemental Table S1. Patterns of seropositivity across the three time-windows of illness**

| <b>Within 7 days of onset of illness*</b> | <b>10-28 days</b> | <b>6-10 weeks</b> | <b>Anti-RBD assay [n (%)]<br/>N=743</b> | <b>Anti-NC assay [n (%)]<br/>N=673</b> |
|-------------------------------------------|-------------------|-------------------|-----------------------------------------|----------------------------------------|
| Negative                                  | Negative          | Negative          | 99 (13.3)                               | 120 (17.8%)                            |
| Negative                                  | Negative          | Positive          | 21 (2.8)                                | 39 (5.8%)                              |
| Negative                                  | Positive          | Negative          | 7 (1.0)                                 | 12 (1.8%)                              |
| Negative                                  | Positive          | Positive          | 305 (40.9)                              | 269 (40.0%)                            |
| Positive                                  | Negative          | Negative          | 2 (0.3)                                 | 1                                      |
| Positive                                  | Negative          | Positive          | 1 (0.1)                                 | 0                                      |
| Positive                                  | Positive          | Negative          | 2 (0.3)                                 | 12 (1.9%)                              |
| Positive                                  | Positive          | Positive          | 309 (41.4)                              | 220 (33.7%)                            |

\* From the onset of symptoms in case of symptomatic or date of testing for asymptomatic participants.

Anti-NC and anti-RBD IgG denote anti-nucleocapsid and anti-RBD Immunoglobulin-G respectively.
